# Supplementary material for: Diagnosis of Bacterial Bloodstream Infections: A 16S Metagenomics Approach
Source: PubMed Central journal article supplement (PMC4771206; doi:10.1371/journal.pntd.0004470), 2016-02-29

General example

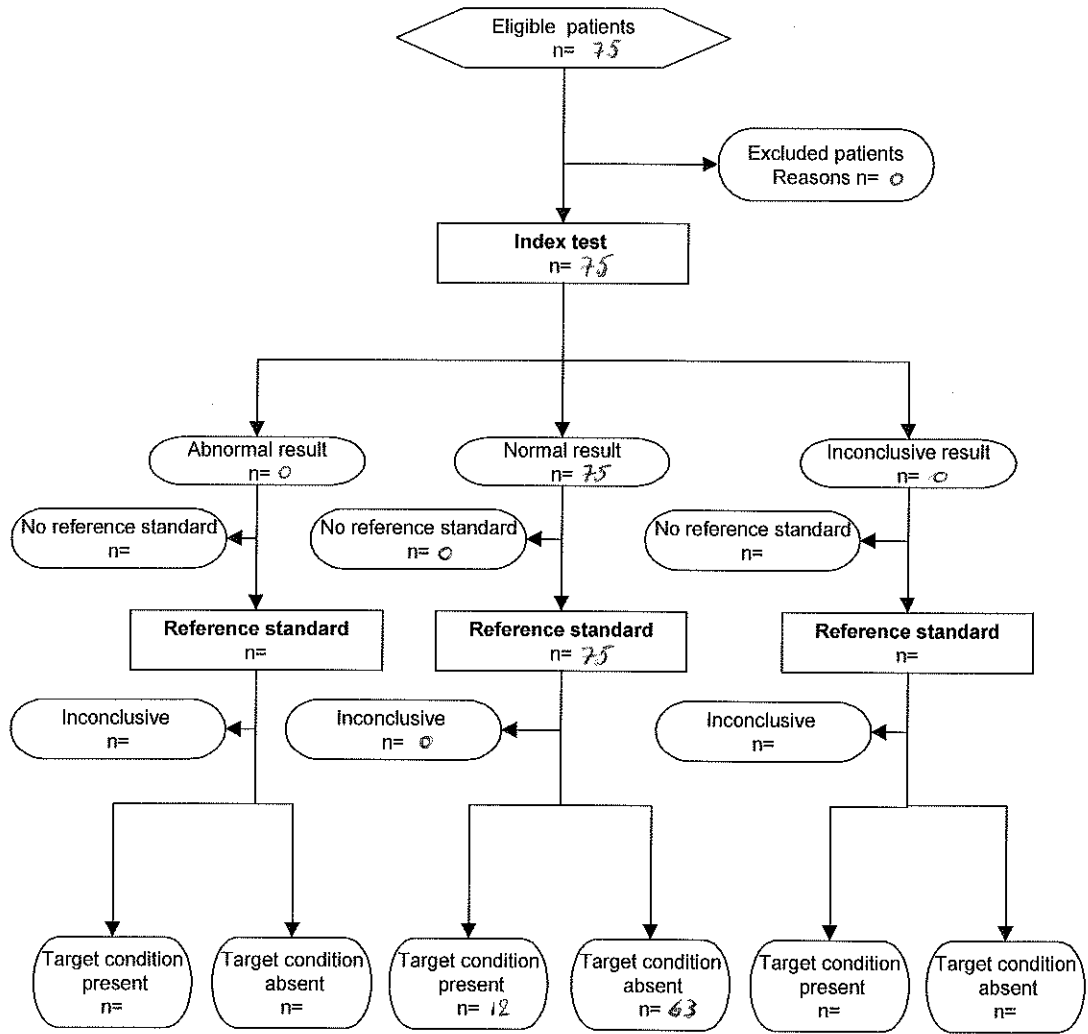

Supplement: pntd.0004470.s002.pdf [file pntd.0004470.s002.pdf]
