# Supplementary material for: Diagnosis of Bacterial Bloodstream Infections: A 16S Metagenomics Approach
Source: PLoS Negl Trop Dis. 2016 Feb 29;10(2):e0004470. doi: 10.1371/journal.pntd.0004470 (PMC4771206; doi:10.1371/journal.pntd.0004470)
Supplement: S1 Table — (PDF) [file pntd.0004470.s004.pdf]

Supplemental table S1. Detailed results of survival, malaria diagnosis, use of prior antibiotics, blood volume used for DNA extraction, blood culture, and replicated (run 1 and run 2) 16S metagenomics for the 75 patients.

[illegible]
